# Supplementary material for: Must analysis of meaning follow analysis of form? A time course analysis
Source: PubMed Central journal article supplement (PMC4366802; doi:10.3389/fnhum.2015.00111), 2015-03-11
Supplement: data_sheet_1.pdf [file data_sheet_1.pdf]

Supplementary Materials for: Must analysis of meaning follow analysis of form? A time course  
analysis

Laurie Beth Feldman<sup>1,2</sup>, Petar Milin<sup>3,4</sup>, Kit Cho<sup>1</sup>, Fermín Moscoso del Prado Martín<sup>5</sup> and Patrick  
A. O'Connor<sup>1</sup>

<sup>1</sup> University at Albany, State University of New York

<sup>2</sup> Haskins Laboratories

<sup>3</sup> Eberhard Karls University Tübingen, Germany

<sup>4</sup> University of Novi Sad, Serbia

<sup>5</sup> University of California, Santa Barbara

Must analysis of meaning follow analysis of form?

*Appendix A: Materials*

| Target | Sem Similar Prime | Sim rating | Sem Dissimilar Prime | Dissim rating | S-D | Unrelated |
|--------|-------------------|------------|----------------------|---------------|-----|-----------|
| ABSENT | absently          |            | absentee             |               |     | Detainee  |
| ARCH   | archway           | 6.2        | archer               | 3.6           | 2.6 | Driveway  |
| AUDIT  | auditor           | 5.5        | auditorium           | 2.4           | 3.1 | Traitor   |
| BAT    | batter            | 4.4        | battery              | 2.5           | 1.9 | Flicker   |
| BOMB   | bombard           | 3.7        | bombastic            | 3.2           | 0.6 | Gymnastic |
| BRAND  | branded           | 4.8        | brandy               | 2.2           | 2.6 | Beady     |
| BUZZ   | buzzer            | 6.1        | buzzard              | 3.1           | 3.0 | Unitard   |
| CAB    | cabstand          | 3.4        | cabbage              | 1.6           | 1.9 | Headstand |
| CANDID | candidly          | 5.7        | candidate            | 2.2           | 3.5 | Validate  |
| CAVE   | cavern            | 5.2        | cavity               | 3.0           | 2.3 | Acidity   |
| CELL   | cellule           | 3.6        | celery               | 1.6           | 2.0 | Fishery   |
| COAST  | coastal           | 6.2        | coaster              | 3.3           | 3.0 | Growler   |
| CODE   | codify            | 4.6        | codeine              | 1.8           | 2.8 | Typify    |
| CORD   | cordless          | 4.0        | cordial              | 2.3           | 1.8 | Denial    |
| COUNT  | countable         | 5.5        | county               | 2.6           | 3.0 | Adorable  |
| CRATE  | crated            | 4.6        | crater               | 2.8           | 1.8 | Booted    |
| CURE   | curable           | 6.2        | curator              | 2.9           | 3.3 | Aviator   |
| CUSTOM | customary         | 5.7        | customer             | 2.2           | 3.5 | Rotary    |
| CUTE   | cuteness          | 6.7        | cuticle              | 1.5           | 5.3 | Icicle    |
| DENT   | dented            | 6.3        | dentist              | 1.6           | 4.7 | Flutist   |
| DIVIDE | divisor           | 4.8        | divisive             | 4.1           | 0.7 | Elector   |
| DOLL   | dolly             | 4.8        | dollar               | 1.7           | 3.1 | Pulsar    |
| EAR    | earplug           | 5.3        | earmark              | 3.1           | 2.2 | Sparkplug |
| EARN   | earnable          | 5.5        | earnest              | 3.3           | 2.2 | Amenable  |
| FAIR   | fairness          | 6.3        | fairly               | 1.9           | 4.4 | Vastness  |
| FILL   | filling           | 5.9        | filly                | 3.6           | 2.3 | Purring   |
| FLAT   | flatly            | 5.7        | flatware             | 3.3           | 2.4 | Meekly    |
| FLOAT  | flotation         | 6.0        | flotilla             | 2.3           | 3.7 | Gorilla   |
| FRUIT  | fruity            | 5.9        | fruitless            | 3.7           | 2.2 | Bulky     |
| GENE   | genetic           | 6.3        | genial               | 3.5           | 2.9 | Facial    |
| GLOSS  | glossy            | 6.1        | glossary             | 2.1           | 4.0 | Urinary   |
| HOST   | hostess           | 6.4        | hostage              | 2.0           | 4.5 | Poetess   |
| IRON   | ironware          | 4.4        | irony                | 2.1           | 2.3 | Hardware  |
| LAB    | labor             | 2.8        | labial               | 2.0           | 0.7 | Partial   |
| LIQUID | liquify           | 5.5        | liquidate            | 4.1           | 1.4 | Fixate    |
| MESS   | messy             | 6.7        | messmate             | 3.4           | 3.3 | Bunkmate  |
| PALACE | palatial          | 3.1        | palatable            | 1.7           | 1.4 | Notable   |
| PATH   | pathway           | 6.6        | pathology            | 2.6           | 4.0 | Mythology |
| PIG    | piglet            | 6.4        | pigment              | 1.7           | 4.8 | Triplet   |
| PINK   | pinkest           | 5.4        | pinkie               | 2.8           | 2.6 | Keenest   |
| PROOF  | proven            | 5.9        | proofing             | 5.0           | 0.9 | Toughen   |

Must analysis of meaning follow analysis of form?

|        |           |     |           |     |     |           |
|--------|-----------|-----|-----------|-----|-----|-----------|
| PURE   | purity    | 6.4 | puree     | 2.8 | 3.6 | Goatee    |
| QUOTE  | quotation | 6.4 | quotient  | 2.4 | 4.0 | Coalition |
| RAT    | ratty     | 3.7 | ratify    | 1.5 | 2.1 | Fortify   |
| RELY   | reliable  | 6.0 | relish    | 1.8 | 4.2 | Variable  |
| SAUCE  | saucy     | 5.5 | saucer    | 3.0 | 2.5 | Banker    |
| SAVE   | savings   | 6.0 | savant    | 2.5 | 3.5 | Defiant   |
| SEED   | seedless  |     | seedy     |     |     | Endless   |
| SKIN   | skinless  | 3.9 | skinny    | 3.1 | 0.8 | Beefy     |
| SLIME  | slimy     | 6.1 | slimmer   | 2.1 | 4.0 | Oily      |
| SNEAK  | sneaky    | 6.4 | sneaker   | 2.5 | 3.9 | Chalky    |
| SOFT   | soften    | 6.3 | softball  | 2.9 | 3.4 | Deafen    |
| SORE   | soreness  | 6.5 | sorely    | 4.4 | 2.2 | Tidiness  |
| STAB   | stabber   | 6.0 | stable    | 2.1 | 3.9 | Missile   |
| STATUE | statuette | 4.5 | statuary  | 3.5 | 1.0 | Canary    |
| STORE  | storage   | 4.8 | storybook | 2.1 | 2.7 | Checkbook |
| STRIDE | striding  | 5.9 | strident  | 3.2 | 2.7 | Feigning  |
| STRING | stringy   | 5.9 | stringer  | 3.8 | 2.2 | Bugler    |
| SWEAT  | sweaty    | 6.5 | sweater   | 3.1 | 3.3 | Mighty    |
| TART   | tartness  | 5.4 | tartar    | 3.0 | 2.4 | Illness   |
| THICK  | thicken   | 5.6 | thicket   | 3.3 | 2.3 | Anklet    |
| TREAT  | treatment | 6.0 | treaty    | 2.4 | 3.6 | Pavement  |
| WEAR   | wearable  | 5.6 | weary     | 2.4 | 3.2 | Filmable  |

Must analysis of meaning follow analysis of form?

*Appendix B:*  
Materials for the spelling test

accomplice  
broccoli  
decadent  
euphoric  
filament  
graffiti  
gullible  
impotent  
lingerie  
minstrel  
pinnacle  
ravenous  
scenario  
succinct  
vigilant

Must analysis of meaning follow analysis of form?

*Appendix C:*

Materials for the vocabulary test

- |                |                 |               |                 |
|----------------|-----------------|---------------|-----------------|
| 1. Toxin       | 7. Sever        | 13. Supple    | 19. Gibe        |
| a. poison      | a. label        | a. condensed  | a. injure       |
| b. weed        | b. learn        | b. shrewd     | b. gossip       |
| c. failure     | c. scold        | c. flexible   | c. scoff        |
| d. belief      | d. mend         | d. useful     | d. point        |
| e. disease     | e. cut          | e. cheerful   | e. doubt        |
| 2. Competition | 8. Chronicle    | 14. Valid     | 20. Gaudy       |
| a. achievement | a. mural        | a. sound      | a. happy        |
| b. capacity    | b. history      | b. brave      | b. frozen       |
| c. repayment   | c. clock        | c. moral      | c. showy        |
| d. selection   | d. large pimple | d. careful    | d. worthless    |
| e. rivalry     | e. jar          | e. neutral    | e. clumsy       |
| 3. Symptom     | 9. Adept        | 15. Refute    | 21. Edifice     |
| a. harmony     | a. actual       | a. recover    | a. building     |
| b. outline     | b. extreme      | b. seek       | b. body of laws |
| c. indication  | c. skilled      | c. enroll     | c. design       |
| d. result      | d. distinct     | d. control    | d. assistance   |
| e. invention   | e. fortunate    | e. disprove   | e. entrance     |
| 4. Partition   | 10. Imaginary   | 16. Adorn     | 22. Sinuous     |
| a. spasm       | a. insulting    | a. paint      | a. polished     |
| b. passageway  | b. fancied      | b. praise     | b. dangerous    |
| c. division    | c. exaggerated  | c. fasten     | c. dark         |
| d. bias        | d. foolish      | d. ornament   | d. feminine     |
| e. treatment   | e. temporary    | e. admire     | e. winding      |
| 5. Annul       | 11. Lore        | 17. Turbulent | 23. Undue       |
| a. approve     | a. knowledge    | a. bulging    | a. unready      |
| b. enforce     | b. interval     | b. towering   | b. exposed      |
| c. revise      | c. sermon       | c. agitated   | c. unexpected   |
| d. corrupt     | d. crack        | d. powerful   | d. excessive    |
| e. cancel      | e. cuff         | e. concealed  | e. scanty       |
| 6. Retard      | 12. Concord     | 18. Allege    | 24. Cacophony   |
| a. resume      | a. victory      | a. assert     | a. adjunct      |
| b. delay       | b. harmony      | b. warn       | b. link         |
| c. substitute  | c. structure    | c. suspect    | c. officer      |
| d. announce    | d. danger       | d. lie        | d. gesture      |
| e. break       | e. weight       | e. decide     | e. discord      |
| 25. Pallet     |                 |               |                 |
| a. rug         |                 |               |                 |
| b. fence       |                 |               |                 |

Must analysis of meaning follow analysis of form?

- c. garden
- d. trough
- e. bed

26. Evince

- a. report
- b. display
- c. evade
- d. develop
- e. detect

27. Censure

- a. blame
- b. suppress
- c. deny
- d. register
- e. resolve

28. Incursion

- a. sudden invasion
- b. condemnation
- c. spiral movement
- d. repulse
- e. investigation

29. Choreography

- a. the art of singing
- b. the art of carving
- c. the art of painting
- d. the art of dancing
- e. the art of weaving

30. Divagation

- a. undersea exploration
- b. location of position
- c. wandering
- d. observation of stars
- e. separation
